# Supplementary material for: Searching for alternatives to brain regeneration
Source: PubMed Central journal article supplement — Neural Regen Res. 2021 Mar 25;16(11):2198–200. doi: 10.4103/1673-5374.310683 (PMC8354103; doi:10.4103/1673-5374.310683), 2021-03-25
Supplement: NRR-16-2198_Suppl1.pdf [file NRR-16-2198_Suppl1.pdf]

## OPEN PEER REVIEW REPORT 1

**Name of journal:** Neural Regeneration Research

**Manuscript NO:** NRR-D-20-00980

**Title:** Searching for alternatives to brain regeneration

**Reviewer's Name:** Gopi Margabandhu

**Reviewer's country:** India

### COMMENTS TO AUTHORS

This paper was well written about searching for alternatives to brain regeneration through standard neuroscientific terms. Congratulations to author.

The author described an interesting perspective about the searching for alternatives to brain regeneration. They verified more positive effects of neurogenesis and also huge number of questions with answer from neurogenesis to brain plasticity. Few innovative points of this manuscript.

1. Initially, provided that stem cell driven and brain plasticity was quite better and reference also good.
2. Fig. 1 was well drafted and legends around synaptic plasticity in mammalian brain.
